# Supplementary material for: Bioactive triple peptide inhibits inflammasome activation to alleviate Salmonella-induced intestinal inflammation in mice via modulation of host defense and bacterial virulence
Source: Royal Society of Chemistry journal article supplement (doi:10.1039/d1fo03891e), 2022-01-01
Supplement: d1fo03891e1.pdf [file d1fo03891e1.pdf]

**Supplementary Table 1.** Primers used for RT-PCR analysis.

| <b>Primer</b>   | <b>Primer sequences (5' → 3')</b>                   |
|-----------------|-----------------------------------------------------|
| m-GAPDH         | AACTTTGGCATTGTGGAAGG<br>GGATGCAGGGATGATGTTCT        |
| m-TNF- $\alpha$ | CGGAGTCCGGGCAGGTCTACTTT<br>GTCCAGGTCACTGTCCCAGCATC  |
| m-IL-1 $\beta$  | CTGTCTGTCTGTCTGTCTGTCT<br>TCATTCAGGTCCTCTTGCTCATA   |
| m-IL-6          | CCGGAGAGGAGACTTCACAG<br>CAGAATTGCCATTGCACAAC        |
| m-IL-12         | CCGGTCCAGCATGTGTCAA<br>CAGGTTTCGGGACTGGCTAAGA       |
| m-ZO-1          | TCATCCCAAATAAGAACAGAGC<br>GAAGAACAACCCTTTCATAAGC    |
| m-ZO-2          | TAAAGGTGAAACCGTGACCA<br>CACAGGCCAGGATGTCTCTA        |
| m-Occludin      | GCTTATCTTGGGAGCCTGGACA<br>GTCATTGCTTGGTGCATAATGATTG |

**Supplementary Table 2.** Primers of *S. Typhimurium* virulence factors used for RT-PCR analysis.

| <b>Primer</b> | <b>Primer sequences (5' → 3')</b>                |
|---------------|--------------------------------------------------|
| <i>fljB</i>   | CATCAAAGGTCTGACTCAGGCT<br>TGATTCAGCCTGGATGGAGTC  |
| <i>fliC</i>   | AGAACCGTTTCAACTCCGCTAT<br>ACGCAGTAAAGAGAGGACGTTT |
| <i>prgI</i>   | CAAACGCAGGTAACAGAGGC<br>TTTACCGTGTTTCGATTGCGC    |
| <i>prgJ</i>   | GCAGGCGGTCAATATCAGGT<br>GCAATCGCCGAACCAGAAAA     |
| <i>gyrB</i>   | TCATTTCCACTACGAAGGCG<br>CCGATACCGTCTTTTTTCGGT    |

**Supplementary Table 3.** Bodyweight gain of mice (% of initial)

| Group   | Day 1        | Day 2        | Day 3         | Day 4            |
|---------|--------------|--------------|---------------|------------------|
| Control | -0.003±0.716 | 1.224±0.510  | 1.371±0.703   | 1.264±0.649      |
| BTP     | 1.189±0.465  | 0.434±0.647  | 0.089±0.575   | -1.770±0.614     |
| ST      | 0.347±1.805  | -2.066±2.722 | -6.609±3.062* | -15.340±2.956*** |
| ST+BTP  | 0.941±0.719  | 0.362±0.962  | -5.394±2.075  | -12.170±2.092    |

The results are shown as mean ± SEM, n = 8.

\* $p < 0.05$ , \*\*\* $p < 0.001$  vs. the control group.

**Supplementary Table 4.** Food intake of mice (g/d)

| Group   | Day 1       | Day 2       | Day 3        | Day 4          |
|---------|-------------|-------------|--------------|----------------|
| Control | 3.197±0.045 | 3.334±0.146 | 3.238±0.108  | 3.381±0.100    |
| BTP     | 3.298±0.092 | 3.207±0.097 | 3.253±0.157  | 2.950±0.270    |
| ST      | 3.127±0.175 | 3.172±0.338 | 2.458±0.211* | 1.155±0.271*** |
| ST+BTP  | 3.476±0.079 | 3.124±0.298 | 2.259±0.082  | 1.251±0.275    |

The results are shown as mean ± SEM, n = 8.

\* $p < 0.05$ , \*\*\* $p < 0.001$  vs. the control group.
